# Supplementary material
Source: Springer Nature journal article supplement (https://www.springermedizin.de/resource/supplementary/12985_2010_1030_MOESM1_ESM.pdf/9608984)

Marker 1 2 3 4 5

2000bp  
1500bp

1000bp  
750bp

500bp

250bp

100bp

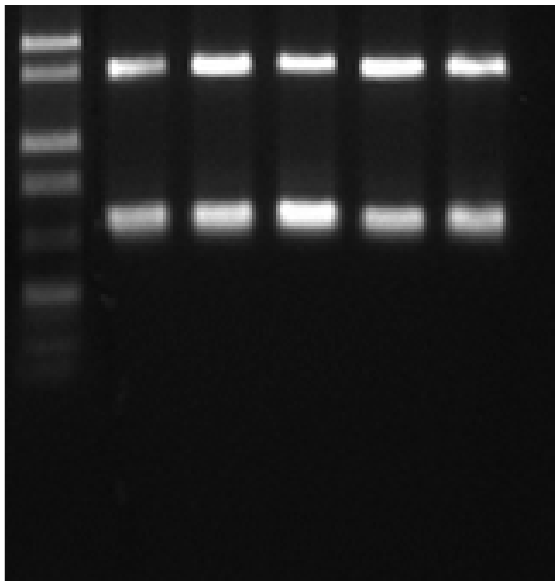

← PCV2

← N gene (PRRSV)

Supplement: MOESM1 [file 9608984]
